# Supplementary material for: Immunotherapy based on bispecific T-cell engager with hIgG1 Fc sequence as a new therapeutic strategy in multiple myeloma
Source: PubMed Central journal article supplement — Cancer Sci. 2015 Mar 13;106(5):512–21. doi: 10.1111/cas.12631 (PMC4452151; doi:10.1111/cas.12631), 2015-03-13
Supplement: cas0106-0512-sd1.pdf [file cas0106-0512-sd1.pdf]

## Supporting information - Supplementary Figures and Tables

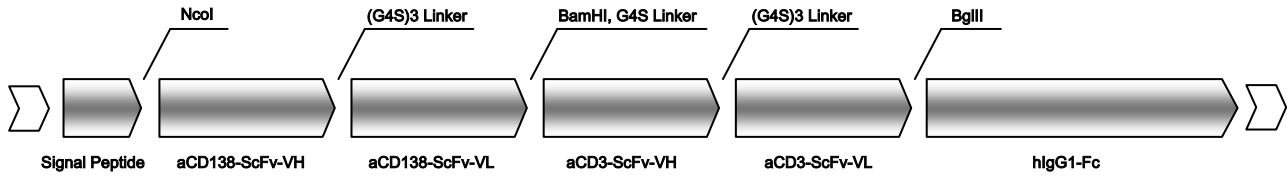

**Fig. S1. Design of BiTE-hIgFc molecule construction.**

From the 5' end to the 3' end (left to right), the structure of pFUSE-BiTE-hIgFc (STL001) includes, in order, a signal peptide that leads to cellular extra secretion of the expressed protein, a NcoI cloning site, aCD138-ScFv-VH, a (G4S)<sub>3</sub> linker for easy assembly of the variable regions of heavy and light chains (VH and VL), aCD138-ScFv-VL, a BamHI cloning site, a G4S Linker, aCD3-ScFv-VH, a (G4S)<sub>3</sub> Linker, aCD3-ScFv-VL, a BglII cloning site and hIgG1-Fc.

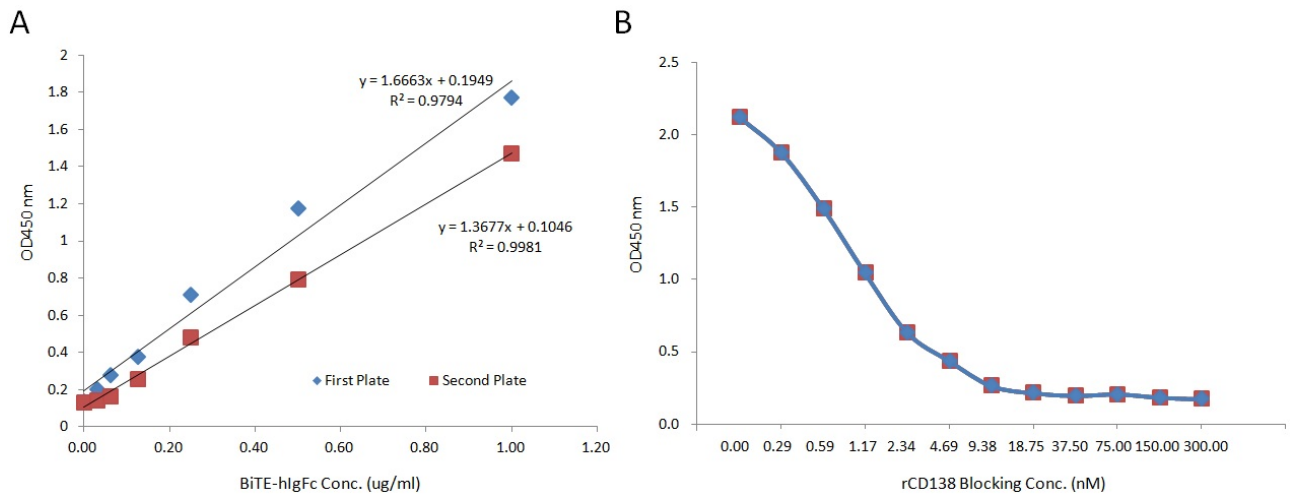

**Fig. S2. The competitive ELISA analysis of rCD138 and BiTE-hIgFc (STL001).** In both ELISA plates, the rCD138 coating protein concentration was 0.1  $\mu\text{g}/\text{mL}$ . **(A)** After incubation with 0.00, 0.03, 0.06, 0.13, 0.25, 0.50 and 1.00  $\mu\text{g}/\text{mL}$  antibody, the primary antibody solution in the first 96-well ELISA plate (blue line) was pipetted into the second ELISA plate (red line). R2 shows the fit of linear regression for both plates. **(B)** A gradual blocking concentration of rCD138 solution (0.00-300.00 nM) and 1.00  $\mu\text{g}/\text{mL}$  primary BiTE-hIgFc (STL001) was used to determine the blocking ability of rCD138 against BiTE-hIgFc (STL001). Three repeated measures per group were performed in the competitive ELISA.

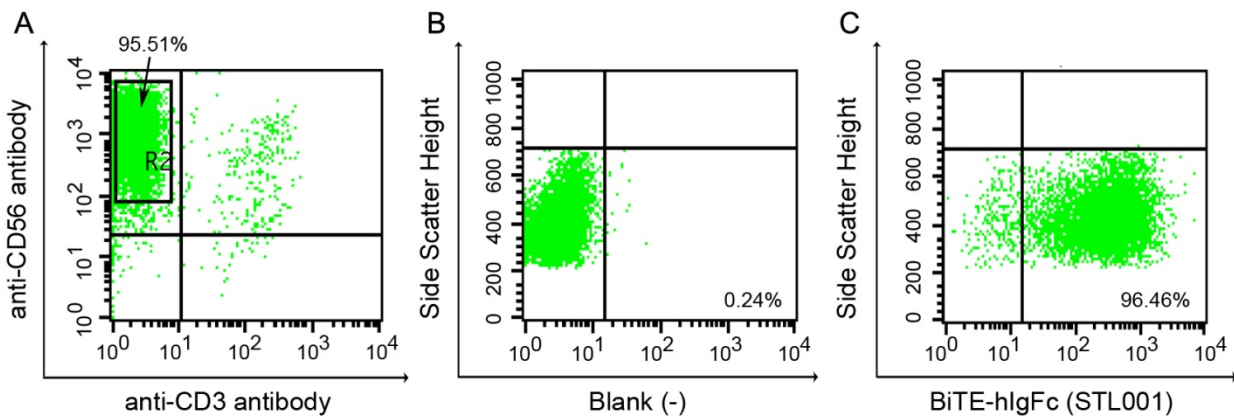

**Fig. S3. Specific binding of NK cells via Fc gamma receptor.** After 2 weeks of PBMC stimulation by irradiated K562 cell lines transfected with membrane-bound IL-21, IL-15, CD137L and CD86 molecules, and cell culture with additional IL-2, enriched NK cells accounted for 95.51% **(A)** of the total cell populations. Compared with the negative control **(B)**, the binding rate of NK cells by BiTE-hIgFc via Fc was more than 96% **(C)** of the total NK cells gated by CD3(-) and CD56(+) (R2, **A**). Staining with PBS solutions was set as the negative control **(B)**.

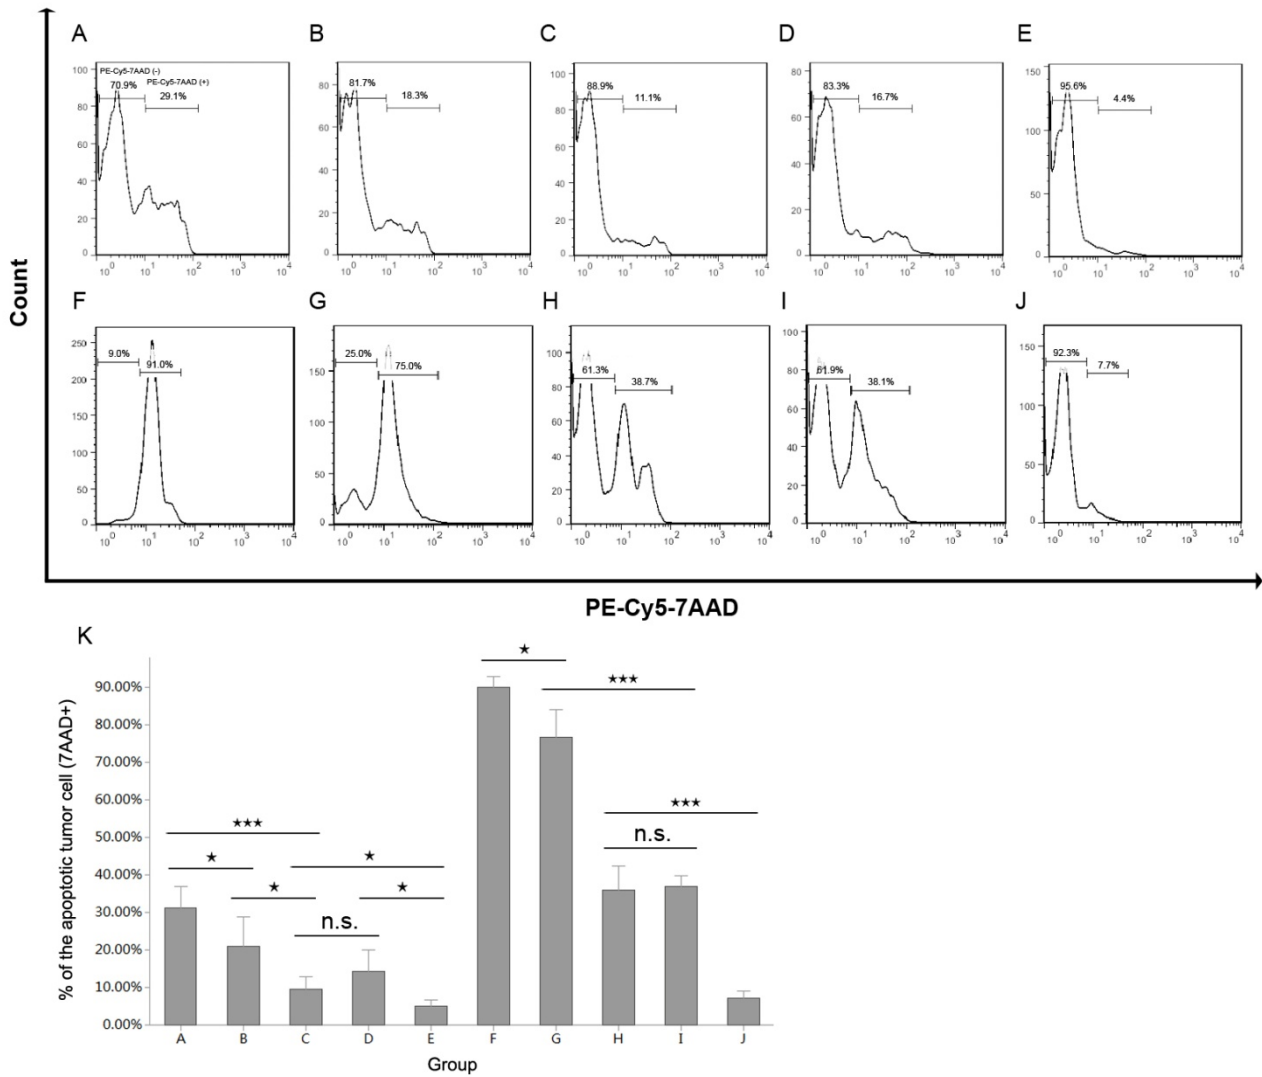

**Fig. S4. Anti-tumor effect analysis of anti-CD138-ScFv-hIgFc and BiTE-hIgFc (STL001).** RPMI-8226 cells were stained with 10  $\mu$ M CFSE solution at 37°C for 15 min.  $1.4 \times 10^6$  PBMC effector cells and  $2.0 \times 10^5$  tumor cells (E:T ratio = 7:1) were mixed in a 96-well microtitre plate in a total volume of 200  $\mu$ L. Anti-CD28 mAb (100 ng/mL) and IL-2 (10 U/mL) were also added to each group. After 24 h (A–E) or 48 h (F–J) incubation of PBMCs and MM cells with the different antibodies, BiTE-hIgFc (STL001) (A, 29.1%; F, 91.0%), or the mixture of aCD138-ScFv-hIgFc and aCD3-ScFv-hIgFc (B, 18.3%; G, 75.0%) showed stronger cell lysis of RPMI-8226 than that of single aCD138-ScFv-hIgFc (C, 11.1%; H, 38.7%) or isotype control groups (D, 16.7%; I, 38.1%). Moreover, the groups without PBMCs (E, 4.4%; J, 7.7%) showed much lower cytotoxicity (E; J) though the presence of BiTE-hIgFc (STL001). Before cytotoxicity analysis by flow cytometry, the RPMI-8226 cells were stained with PE-Cy5-labeled-7-AAD reagent. Data shown in K are means  $\pm$  standard error of the mean (SEM). \* $P < 0.05$ , \*\* $P < 0.01$ , \*\*\* $P < 0.005$  by Student's t-test. And n.s. means non-significant.

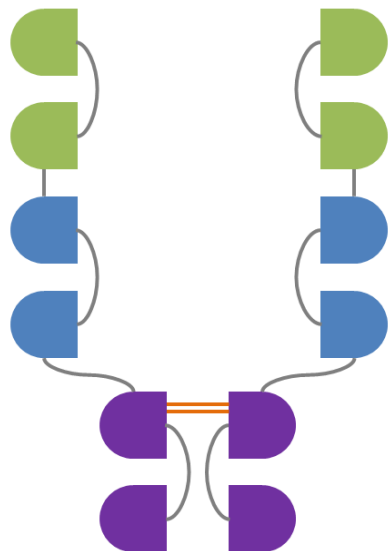

**Fig. S5. Backbone of the BiTE-hIgFc (STL001) molecule.**

The molecule presents a ‘Y’ shape, similar to the traditional full IgG antibody. In this study, green, blue, and purple fragments represent aCD138-ScFv, aCD3-ScFv, and hIgG1 Fc, which target MM tumor cells, T cells, and NK cells, respectively. The orange lines indicate two disulfide-bonds between the hinge regions of the Fc homodimer.

**Table S1. Staining percentages of different antibodies targeting RPMI-8226, U266 and Jurkat cells and PBMCs.**

| Group | Antibody used for cell staining | The staining percentage of different cell lines (%) |                |                |                |
|-------|---------------------------------|-----------------------------------------------------|----------------|----------------|----------------|
|       |                                 | RPMI-8226                                           | U266           | Jurkat         | PBMCs          |
| 1     | BiTE-hIgFc (STL001)             | A, 97.91 ★★★★★                                      | B, 94.55 ★★★★★ | C, 75.65 ★★★★  | D, 72.02 ★★★★★ |
| 2     | aCD138-ScFv-hIgFc               | E, 97.95 ★★★★★                                      | F, 96.08 ★★★★★ | G, 0.31 ☆      | H, 15.95 ★     |
| 3     | aCD3-ScFv-hIgFc                 | I, 1.13 ☆                                           | J, 3.83 ☆      | K, 73.00 ★★★★★ | L, 69.34 ★★★★★ |

The BiTE-hIgFc (STL001) and aCD138-ScFv-hIgFc antibodies showed similar cell staining patterns (five stars) on MM cell lines RPMI-8226 and U266. On the other hand, BiTE-hIgFc (STL001) and aCD3-ScFv-hIgFc antibodies achieved the same pattern (four stars) on Jurkat cells and PBMCs. Due to the bispecific characteristic of BiTE-hIgFc (STL001), targeting hCD138 and hCD3, the antibody stained all four cell lines strongly. However, aCD138-ScFv-hIgFc specifically stained the MM cell lines RPMI-8226 and U266 cells only, and aCD3-ScFv-hIgFc specifically stained CD3+ Jurkat cells and PBMCs only. Five black stars or one hollow star indicates a strong or negative cell staining, respectively.
